# Supplementary material for: Bidirectional interaction of nobiletin and gut microbiota in mice fed with a high-fat diet
Source: Royal Society of Chemistry journal article supplement (doi:10.1039/d1fo00126d), 2021-01-01
Supplement: d1fo00126d1.pdf [file d1fo00126d1.pdf]

## Supplementary Information

Table. S1 The indexes of Shannon, Simpson, and Chao1 for gut microbiota from the high fat diet control group (HFD) and nobiletin treatment group (NOB) at the 4th- and 8th- week. Oneway ANOVA and Bonferroni post-test was used to examined for the significance level.

|         | Shannon                 | Simpson                | Chao1                       |
|---------|-------------------------|------------------------|-----------------------------|
| HFD_4wk | 6.24±0.18 <sup>a</sup>  | 0.95±0.00 <sup>a</sup> | 1337.94±93.88 <sup>a</sup>  |
| NOB_4wk | 6.92±0.14 <sup>b</sup>  | 0.97±0.00 <sup>b</sup> | 1910.93±75.41 <sup>b</sup>  |
| HFD_8wk | 6.94±0.37 <sup>b</sup>  | 0.96±0.01 <sup>a</sup> | 1737.34±165.78 <sup>b</sup> |
| NOB_8wk | 6.50±0.24 <sup>ab</sup> | 0.95±0.00 <sup>a</sup> | 1792.80±217.96 <sup>b</sup> |

Different letters (i.e., a, b, c) in superscript within the same column indicated the statistical significance level  $p < 0.05$
